# Supplementary material
Source: Springer Nature journal article supplement (https://www.springermedizin.de/resource/supplementary/12939_2013_536_MOESM1_ESM.pdf/9551176)

**PANEL A:**

**Without floor of durable material**

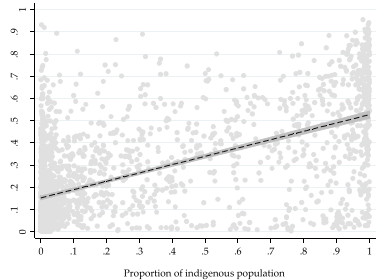

**Without piped water**

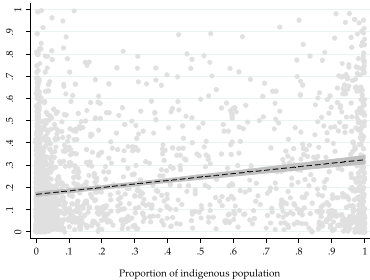

**Without medical insurance**

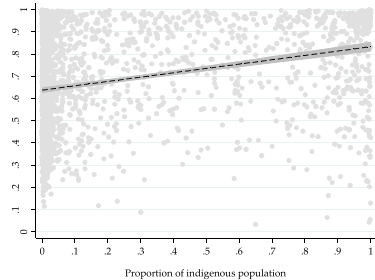

**PANEL B:**

**Illiterate population**

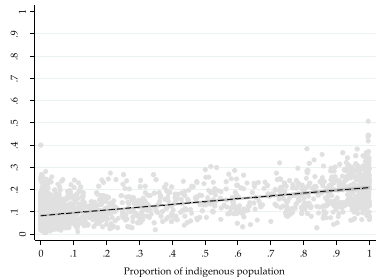

**Below food poverty\***

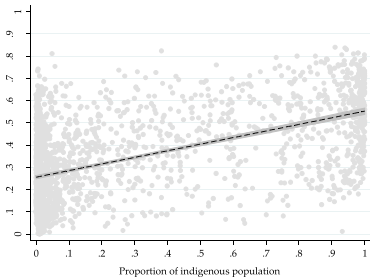

**Human Development index\*\***

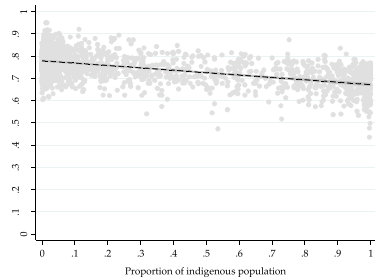

Supplement: MOESM1 [file 9551176]
